# Supplementary material
Source: PubMed Central journal article supplement (PMC6238117)
Supplement: JZUSB19-0871-ESM.pdf [file JZUSB19-0871-ESM.pdf]

Supplementary materials

**Dual flow immunochromatographic assay for rapid and simultaneous quantitative detection of ochratoxin A and zearalenone in corn, wheat and feed samples**

Xian ZHANG<sup>1,2</sup>, Ke HE<sup>1</sup>, Yun FANG<sup>3</sup>, Tong CAO<sup>2</sup>, Narayan PAUDYAL<sup>2</sup>,  
Xiao-feng ZHANG<sup>3</sup>, Hou-hui SONG<sup>1</sup>, Xiao-liang LI<sup>2</sup>, Wei-huan FANG<sup>†1,2</sup>

<sup>1</sup>*China-Australian Joint Laboratory for Animal Health Big Data Analytics, Zhejiang Provincial Engineering Laboratory for Animal Health Inspection and Internet Technology, College of Animal Science and Technology, Zhejiang A&F University, Lin'an 311300, China*

<sup>2</sup>*Zhejiang University Institute of Preventive Veterinary Medicine, Zhejiang Provincial Key Laboratory of Preventive Veterinary Medicine, Hangzhou 310058, China*

<sup>3</sup>*Zhejiang Academy of Science and Technology for Inspection and Quarantine, Hangzhou 310012, China*

<sup>†</sup>E-mail: whfang@zju.edu.cn

**Table S1 Optimal conditions of the dual flow immunochromatographic assay**

| Item                          | Ochratoxin A                                       | Zeralenone                          |
|-------------------------------|----------------------------------------------------|-------------------------------------|
| Diameter of GNPs              | 40 nm                                              |                                     |
| NC membrane                   | Sartorius UniSart CN140                            |                                     |
| Conjugated pad                | Ahlstrom 6613                                      |                                     |
| Sample pad                    | SB08                                               |                                     |
| Volume of GNPs-labeled mAbs   | 4 $\mu\text{l}/\text{cm}^2$                        | 16 $\mu\text{l}/\text{cm}^2$        |
| Concentration of test lines   | 1 $\mu\text{l}$ of OTA-OVA, (0.3 mg/ml)            | 1 $\mu\text{l}$ ZEN-BSA (0.1 mg/ml) |
| Concentration of control line | 1 $\mu\text{l}$ of goat anti mouse IgG (0.3 mg/ml) |                                     |

**Table S2 Buffer types, optimum buffers, and optimum concentrations of additives in the dual flow immunochromatographic assay**

| Buffers                                                          | Optimum buffers                             | Optimum types and concentrations of buffer additives (w/v)                  |
|------------------------------------------------------------------|---------------------------------------------|-----------------------------------------------------------------------------|
| Coating antigen buffer                                           | 50 mM phosphate buffer saline (PBS, pH 7.4) | –                                                                           |
| Sample and conjugate pads pretreated buffer                      | 10 mM phosphate buffer saline (PBS, pH 7.4) | 2% OVA (w/v), 2% sucrose (w/v) and 0.02% $\text{NaN}_3$ (w/v)               |
| Gold-labeled antibody resuspension buffer                        | 2 mM borate buffer (BB, pH 7.4)             | 1% BSA (w/v), 6% sucrose (w/v), 0.2% PEG 20000 and 0.05% sodium azide (w/v) |
| GNPs-labeled antibodies storage, dilution and conjugation buffer | 50 mM borate buffer (BB, pH 8.0)            | 5% (w/v) trehalose, 1% OVA (w/v) and 0.02% $\text{NaN}_3$ (w/v)             |

–, no additives

**Table S3 Comparison of results of gold nanoparticles-based immunochromatographic assay published in the past**

| Target analyte               | Limit of detection (ng/ml) | Working range (ng/ml)              | Ref.                      |
|------------------------------|----------------------------|------------------------------------|---------------------------|
| OTA                          | 500                        | –                                  | (Cho et al., 2005)        |
| OTA                          | 1                          | –                                  | (Anfossi et al., 2012)    |
| OTA                          | 0.05                       | –                                  | (Zhang et al., 2018)      |
| OTA                          | 0.20                       | –                                  | (Majdinasab et al., 2015) |
| ZEN                          | 100                        | –                                  | (Luo et al., 2013)        |
| ZEN                          | 15                         | –                                  | (Ji et al., 2017)         |
| ZEN                          | 0.84                       | –                                  | (Sun et al., 2014)        |
| ZEN                          | 2.5                        | –                                  | (Shim et al., 2009b)      |
| DON and ZEN                  | ZEN: 6                     | –                                  | (Huang et al., 2012)      |
| ZEN and $\text{FB}_1$        | ZEN:0.35                   | ZEN: 0.94–7.52                     | (Wang et al., 2013)       |
| OTA and ZEN                  | OTA: 0.77, ZEN:1.20        | –                                  | (Sun et al., 2016)        |
| OTA and ZEN                  | OTA:2.5, ZEN: 5            | –                                  | (Shim et al., 2009a)      |
| $\text{AFB}_1$ , OTA and ZEN | OTA:0.5, ZEN:1             | –                                  | (Li et al., 2013)         |
| OTA and ZEN                  | OTA: 0.32, ZEN: 0.58       | OTA: 0.53–12.16<br>ZEN: 1.06–39.72 | This study                |

–, not mentioned

## References

- Anfossi L, Giovannoli C, Giraudi G, et al., 2012. A lateral flow immunoassay for the rapid detection of ochratoxin a in wine and grape must. *J Agric Food Chem*, 60(46):11491-11497. <https://doi.org/10.1021/jf3031666>
- Cho YJ, Lee DH, Kim DO, et al., 2005. Production of a monoclonal antibody against ochratoxin a and its application to immunochromatographic assay. *J Agric Food Chem*, 53(22):8447-8451. <https://doi.org/10.1021/jf051681q>
- Huang Z-B, Xu Y, Li L-S, et al., 2012. Development of an immunochromatographic strip test for the rapid simultaneous detection of deoxynivalenol and zearalenone in wheat and maize. *Food Control*, 28(1):7-12. <https://doi.org/https://doi.org/10.1016/j.foodcont.2012.04.035>
- Ji F, Mokoena MP, Zhao H, et al., 2017. Development of an immunochromatographic strip test for the rapid detection of zearalenone in wheat from jiangsu province, china. *PLoS One*, 12(5):e0175282. <https://doi.org/10.1371/journal.pone.0175282>
- Li X, Li P, Zhang Q, et al., 2013. Multi-component immunochromatographic assay for simultaneous detection of aflatoxin b1, ochratoxin a and zearalenone in agro-food. *Biosensors and Bioelectronics*, 49:426-432. <https://doi.org/https://doi.org/10.1016/j.bios.2013.05.039>
- Luo M, Tang Y, Xiang J, et al., 2013. [preparation of anti-zearalenone monoclonal antibody and preliminary establishment of colloidal gold immunochromatographic assay for zearalenone]. *Xi Bao Yu Fen Zi Mian Yi Xue Za Zhi*, 29(7):729-733.
- Majdinasab M, Sheikh-Zeinoddin M, Soleimani-Zad S, et al., 2015. Ultrasensitive and quantitative gold nanoparticle-based immunochromatographic assay for detection of ochratoxin a in agro-products. *Journal of Chromatography B*, 974:147-154. <https://doi.org/https://doi.org/10.1016/j.jchromb.2014.10.034>
- Shim WB, Dzantiev BB, Eremin SA, et al., 2009a. One-step simultaneous immunochromatographic strip test for multianalysis of ochratoxin a and zearalenone. *J Microbiol Biotechnol*, 19(1):83-92.
- Shim WB, Kim KY, Chung DH, 2009b. Development and validation of a gold nanoparticle immunochromatographic assay (icg) for the detection of zearalenone. *J Agric Food Chem*, 57(10):4035-4041. <https://doi.org/10.1021/jf900075h>
- Sun Y, Hu X, Zhang Y, et al., 2014. Development of an immunochromatographic strip test for the rapid detection of zearalenone in corn. *J Agric Food Chem*, 62(46):11116-11121. <https://doi.org/10.1021/jf503092j>
- Sun Y, Xing G, Yang J, et al., 2016. Development of an immunochromatographic test strip for simultaneous qualitative and quantitative detection of ochratoxin a and zearalenone in cereal. *J Sci Food Agric*, 96(11):3673-3678. <https://doi.org/10.1002/jsfa.7550>
- Wang YK, Yan YX, Ji WH, et al., 2013. Rapid simultaneous quantification of zearalenone and fumonisin b1 in corn and wheat by lateral flow dual immunoassay. *J Agric Food Chem*, 61(21):5031-5036. <https://doi.org/10.1021/jf400803q>
- Zhang M, Yan L, Huang Q, et al., 2018. Highly sensitive simultaneous detection of major ochratoxins by an immunochromatographic assay. *Food Control*, 84:215-220. <https://doi.org/https://doi.org/10.1016/j.foodcont.2017.07.035>
